# Supplementary material for: Is Physical Activity Protective against Emotional Eating Associated Factors during the COVID-19 Pandemic? A Cross-Sectional Study among Physically Active and Inactive Adults
Source: MDPI journal article supplement (doi:10.3390/nu13113861), 2021-10-28
Supplement: s1 [file s1]

**Table S1** Descriptive analysis of independent variables by level of physical activity. Brazil, 2021 (n=598)

| Variables                                                 | Total sample | Active group (n=220)<br>n (%) | Inactive group (n=378) | p       |
|-----------------------------------------------------------|--------------|-------------------------------|------------------------|---------|
| <b>Perception on life habits during the pandemic</b>      |              |                               |                        |         |
| <b>Stress Level During the Pandemic</b>                   |              |                               |                        | 0.011*  |
| Decreased stress                                          | 193 (32.3)   | 85 (38.6)                     | 108 (28.6)             |         |
| Increased stress                                          | 405 (67.7)   | 135 (61.4)                    | 270 (71.4)             |         |
| <b>Sleep During the Pandemic</b>                          |              |                               |                        | 0.003*  |
| Better sleep                                              | 404 (67.6)   | 165 (75)                      | 239 (63.2)             |         |
| Worse sleep                                               | 194 (32.4)   | 55 (25)                       | 139 (36.8)             |         |
| <b>Perception on body satisfaction</b>                    |              |                               |                        |         |
| <b>Body Satisfaction</b>                                  |              |                               |                        | 0.057   |
| Satisfied                                                 | 398 (66.6)   | 157 (71.4)                    | 241 (63.8)             |         |
| Dissatisfied                                              | 200 (33.4)   | 63 (28.6)                     | 137 (36.2)             |         |
| <b>Attempt to lose weight</b>                             |              |                               |                        | <0.001* |
| Yes                                                       | 378 (63.2)   | 173 (78.6)                    | 205 (54.2)             |         |
| No                                                        | 220 (36.8)   | 47 (21.4)                     | 173 (45.8)             |         |
| <b>Perception on eating habits during the pandemic</b>    |              |                               |                        |         |
| <b>Eating Habits</b>                                      |              |                               |                        | <0.001* |
| Better eating habits                                      | 471 (78.8)   | 192 (87.3)                    | 279 (73.8)             |         |
| Worse eating habits                                       | 127 (21.2)   | 28 (12.7)                     | 99 (26.2)              |         |
| <b>Amount of Food Consumption</b>                         |              |                               |                        | 0.143   |
| Decreased food amount                                     | 352 (58.9)   | 138 (62.7)                    | 214 (56.6)             |         |
| Increased food amount                                     | 246 (41.1)   | 82 (37.3)                     | 164 (43.4)             |         |
| <b>Food Preparation at Home</b>                           |              |                               |                        | 0.253   |
| Decreased home cooking                                    | 48 (8.0)     | 14 (6.4)                      | 34 (9)                 |         |
| Increased home cooking                                    | 550 (92.0)   | 206 (93.6)                    | 344 (91)               |         |
| <b>Purchase of Food Delivery</b>                          |              |                               |                        | 0.924   |
| Decreased purchase of food delivery                       | 344 (57.5)   | 126 (57.3)                    | 218 (57.7)             |         |
| Increased purchase of food delivery                       | 254 (42.5)   | 94 (42.5)                     | 160 (42.3)             |         |
| <b>Perception on food consumption during the pandemic</b> |              |                               |                        |         |
| <b>Vegetable Consumption</b>                              |              |                               |                        | 0.002*  |
| Decreased                                                 | 412 (68.9)   | 135 (61.4)                    | 277 (73.3)             |         |
| Increased                                                 | 186 (31.1)   | 85 (38.6)                     | 101 (26.7)             |         |
| <b>Fresh fruit Consumption</b>                            |              |                               |                        | 0.005*  |
| Decreased                                                 | 404 (67.6)   | 133 (60.5)                    | 271 (71.7)             |         |
| Increased                                                 | 194 (32.4)   | 87 (39.5)                     | 107 (28.3)             |         |
| <b>Refined Cereal Consumption</b>                         |              |                               |                        | <0.001* |
| Decreased                                                 | 68 (11.4)    | 39 (17.7)                     | 29 (7.7)               |         |
| Increased                                                 | 530 (88.6)   | 181 (82.3)                    | 349 (92.3)             |         |
| <b>Sweets and dessert Consumption</b>                     |              |                               |                        | 0.003*  |
| Decreased                                                 | 132 (22.1)   | 63 (28.6)                     | 69 (18.3)              |         |

|                              |            |            |            |        |
|------------------------------|------------|------------|------------|--------|
| Increased                    | 466 (77.9) | 157 (71.4) | 309 (81.7) | 0.004* |
| <b>Fast Food Consumption</b> |            |            |            |        |
| Decreased                    | 209 (34.9) | 93 (42.3)  | 116 (30.7) |        |
| Increased                    | 389 (65.1) | 127 (57.7) | 262 (69.3) |        |

---

<sup>a</sup> Variables analyzed by the Mann-Whitney test. \*Significant variables by the Chi-squared test.
